# Supplementary material for: Electroabsorption spectra of directly linked tribenzotetraazachlorin-fullerene conjugates having either electron donating or withdrawing substituents in a polymer film
Source: Royal Society of Chemistry journal article supplement (doi:10.1039/b906080d), 2009-01-01
Supplement: b906080d.pdf [file b906080d.pdf]

## Supporting Information

**Table S-1.** The magnitude of  $A$ ,  $\Delta\mu$ , and  $\Delta\alpha$  for photo excitation into each of the Gaussian components.

| compd    | Band #     | $\nu/\text{cm}^{-1}$ | $\lambda/\text{nm}$ | $\Delta\nu/\text{cm}^{-1}$ | $A$                                      | $\Delta\mu/\text{D}$ | $\Delta\alpha/\text{\AA}^3$ |
|----------|------------|----------------------|---------------------|----------------------------|------------------------------------------|----------------------|-----------------------------|
| <b>1</b> | G1         | 20200                | 495                 | 1950                       | $7.00 \times 10^{-4}$                    | 3.60                 | 27.29                       |
|          | G2         | 18350                | 545                 | 1790                       | $4.50 \times 10^{-3}$                    | 5.30                 | 45.49                       |
|          | G3         | 17180                | 582                 | 1280                       | $1.00 \times 10^{-4}$                    | 3.03                 | 3.64                        |
|          | <b>G4</b>  | <b>16050</b>         | <b>623</b>          | <b>1160</b>                | <b><math>-1.00 \times 10^{-4}</math></b> | <b>1.47</b>          | <b>6.00</b>                 |
|          | G5         | 14970                | 668                 | 1050                       | $2.00 \times 10^{-4}$                    | 1.47                 | 21.84                       |
|          | <b>G6</b>  | <b>14005</b>         | <b>714</b>          | <b>1050</b>                | <b><math>-5.00 \times 10^{-4}</math></b> | <b>2.33</b>          | <b>41.85</b>                |
|          | <b>G7</b>  | <b>13160</b>         | <b>760</b>          | <b>840</b>                 | <b><math>3.50 \times 10^{-4}</math></b>  | <b>2.55</b>          | <b>36.39</b>                |
|          | G8         | 12470                | 802                 | 730                        | $3.00 \times 10^{-4}$                    | 2.08                 | 36.39                       |
| <b>2</b> | G9         | 18940                | 528                 | 2770                       | $-2.80 \times 10^{-3}$                   | 3.29                 | -72.78                      |
|          | G10        | 17270                | 579                 | 1240                       | $2.80 \times 10^{-3}$                    | 1.80                 | -13.65                      |
|          | <b>G11</b> | <b>16310</b>         | <b>613</b>          | <b>750</b>                 | <b><math>1.00 \times 10^{-4}</math></b>  | <b>1.80</b>          | <b>-13.65</b>               |
|          | G12        | 15670                | 638                 | 820                        | 0.00                                     | 1.80                 | 13.65                       |
|          | G13        | 14450                | 692                 | 1500                       | $2.00 \times 10^{-3}$                    | 3.12                 | -8.19                       |
|          | <b>G14</b> | <b>13250</b>         | <b>755</b>          | <b>790</b>                 | <b><math>-1.00 \times 10^{-3}</math></b> | <b>2.75</b>          | <b>18.20</b>                |
|          | G15        | 12500                | 800                 | 1740                       | $1.00 \times 10^{-4}$                    | 4.88                 | 181.96                      |
